# Supplementary material for: Photodynamic inactivation of Escherichia coli with cationic ammonium Zn(ii) phthalocyanines
Source: Royal Society of Chemistry journal article supplement (doi:10.1039/c5pp00147a), 2015-07-14
Supplement: c5pp00147a1.pdf [file c5pp00147a1.pdf]

*Supporting information for*

**Photodynamic inactivation of *Escherichia coli* with cationic ammonium  
Zn(II)phthalocyanines**

Deisy M. G. C. Rocha,<sup>a,b</sup> N. Venkatramaiah,<sup>a,c</sup> Maria. C. Gomes,<sup>a,b</sup> Adelaide Almeida,<sup>b</sup> Maria  
A. F. Faustino,<sup>a</sup> Filipe A. Almeida Paz,<sup>c</sup> Ângela Cunha<sup>b\*</sup> and João P. C. Tomé<sup>a,d\*</sup>

<sup>a</sup>*QOPNA and Department of Chemistry, University of Aveiro, 3810-193 Aveiro, Portugal.*

<sup>b</sup>*Department of Biology and CESAM, University of Aveiro, 3810-193 Aveiro, Portugal.*

<sup>c</sup>*CICECO Aveiro Institute of Materials, University of Aveiro, 3810-193 Aveiro, Portugal.*

<sup>d</sup>*Department of Organic and Macromolecular Chemistry, Ghent University, B-9000 Gent,  
Belgium*

*\*Corresponding authors: Angela Cunha: [acunha@ua.pt](mailto:acunha@ua.pt); João P. C. Tomé: [jtome@ua.pt](mailto:jtome@ua.pt)*

**Table of Contents**

|                                                                                    |          |
|------------------------------------------------------------------------------------|----------|
| <b>1. NMRs of the compounds.....</b>                                               | <b>2</b> |
| <b>2. MALDI-TOF MSs .....</b>                                                      | <b>4</b> |
| <b>3. Solubility studies in DMSO and PBS.....</b>                                  | <b>6</b> |
| <b>4. Absorption bands of the Pcs and emission bands of the light sources.....</b> | <b>7</b> |

## 1. NMRs of the compounds

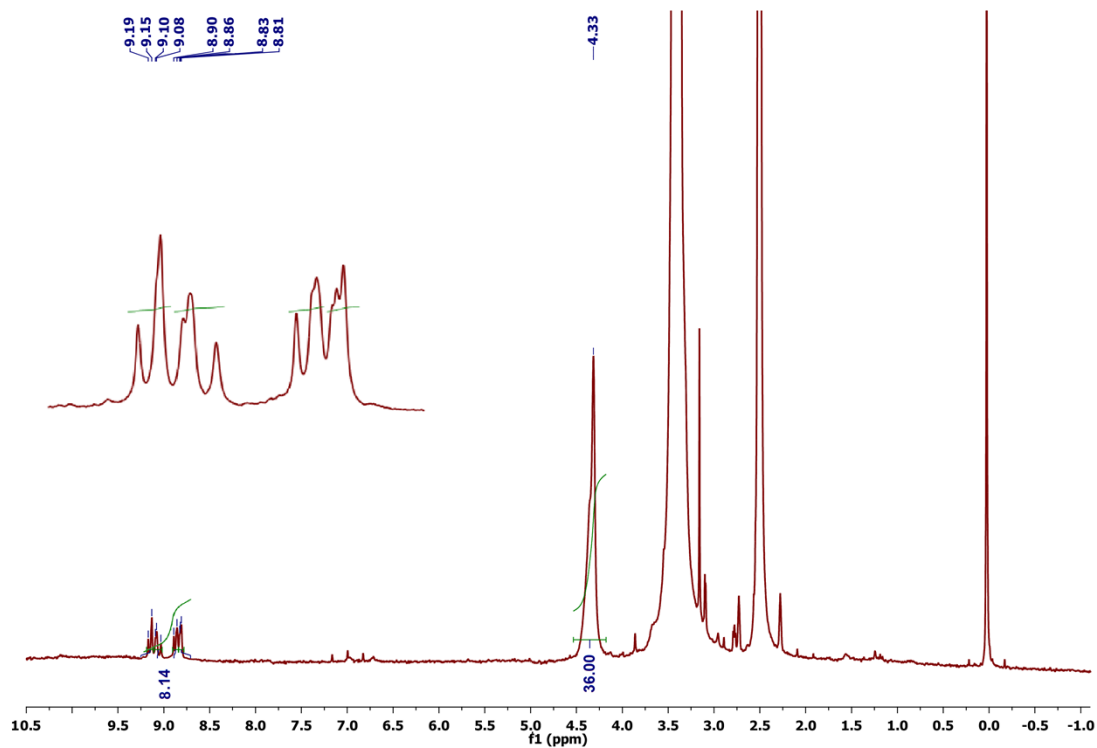

Fig. S1  $^1\text{H}$  NMR (300.13 MHz) spectrum of **1a** in  $\text{DMSO-}d_6$ .

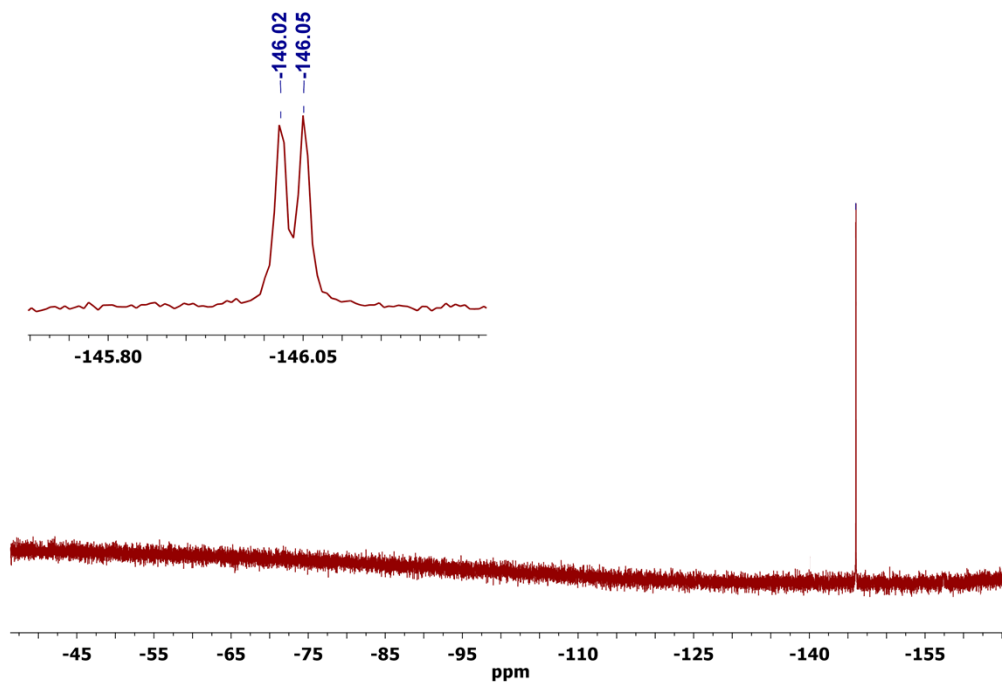

Fig. S2  $^{19}\text{F}$  NMR (282.38 MHz) spectrum of **1a** in  $\text{DMSO-}d_6$ .

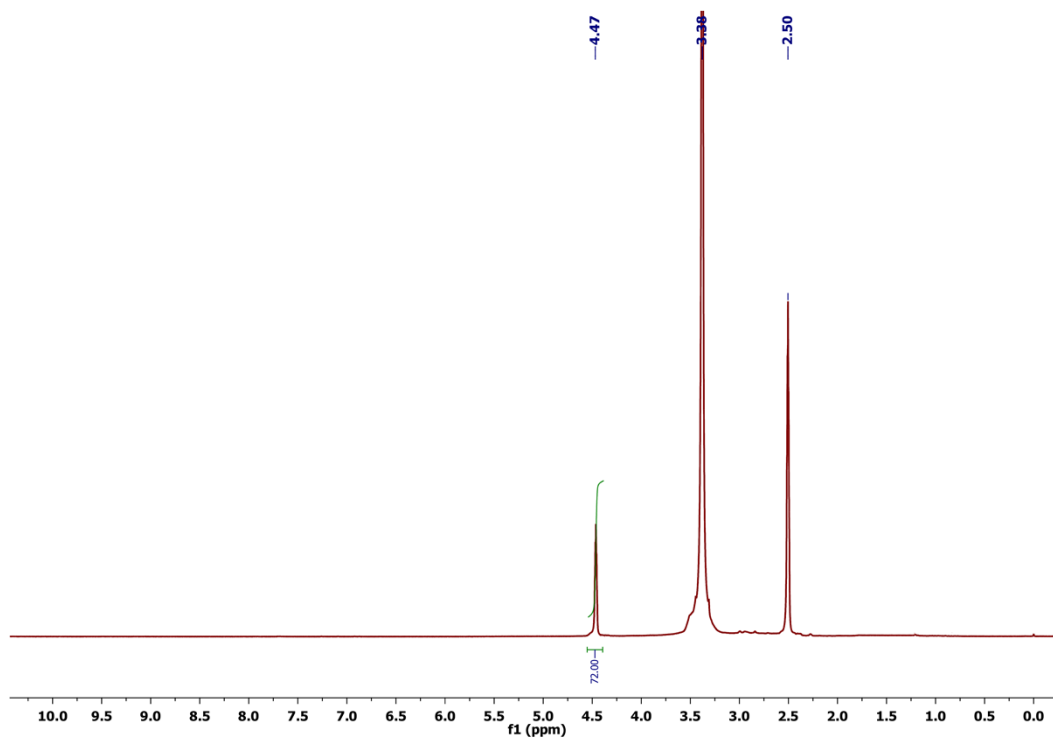

Fig. S 3 <sup>1</sup>H NMR (300.13 MHz) spectrum of **2a** in DMSO-*d*<sub>6</sub>.

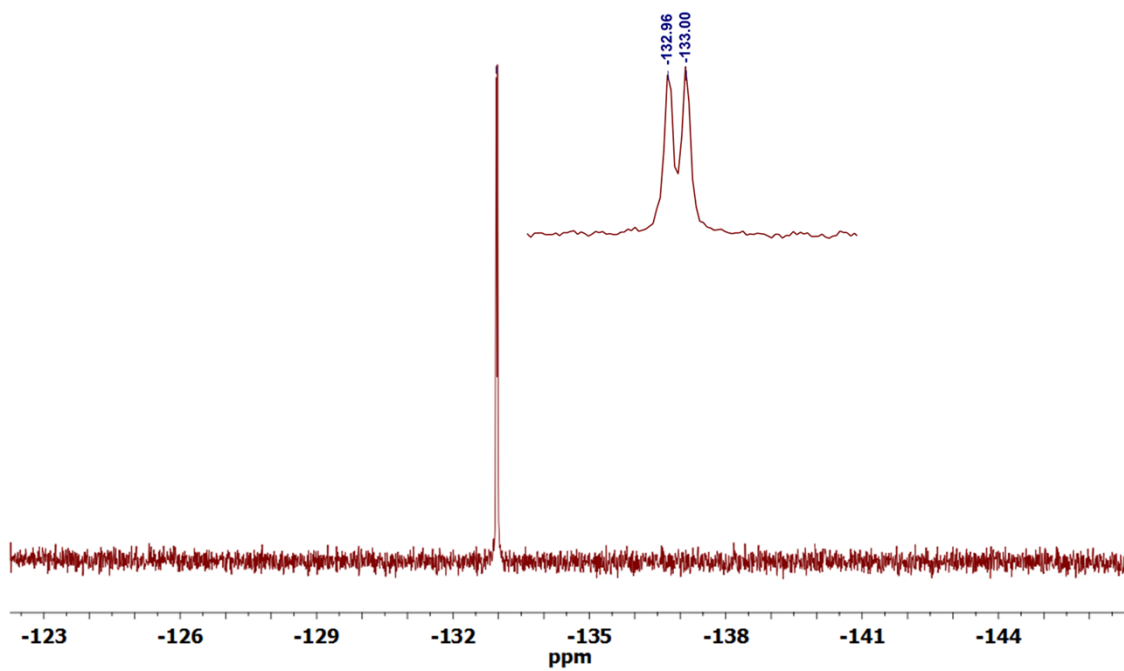

Fig. S4 <sup>19</sup>F NMR (282.38 MHz) spectrum of **2a** in DMSO-*d*<sub>6</sub>.

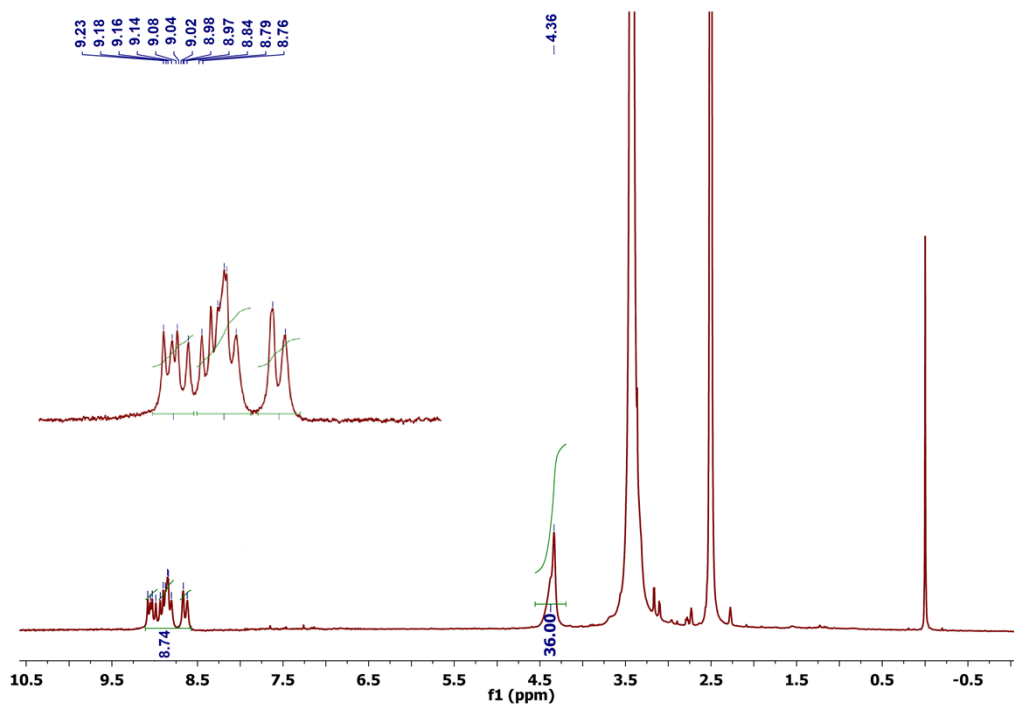

Fig. S5  $^1\text{H}$  NMR (300.13 MHz) spectrum of **3a** in  $\text{DMSO-}d_6$ .

## 2. MALDI-TOF MSs

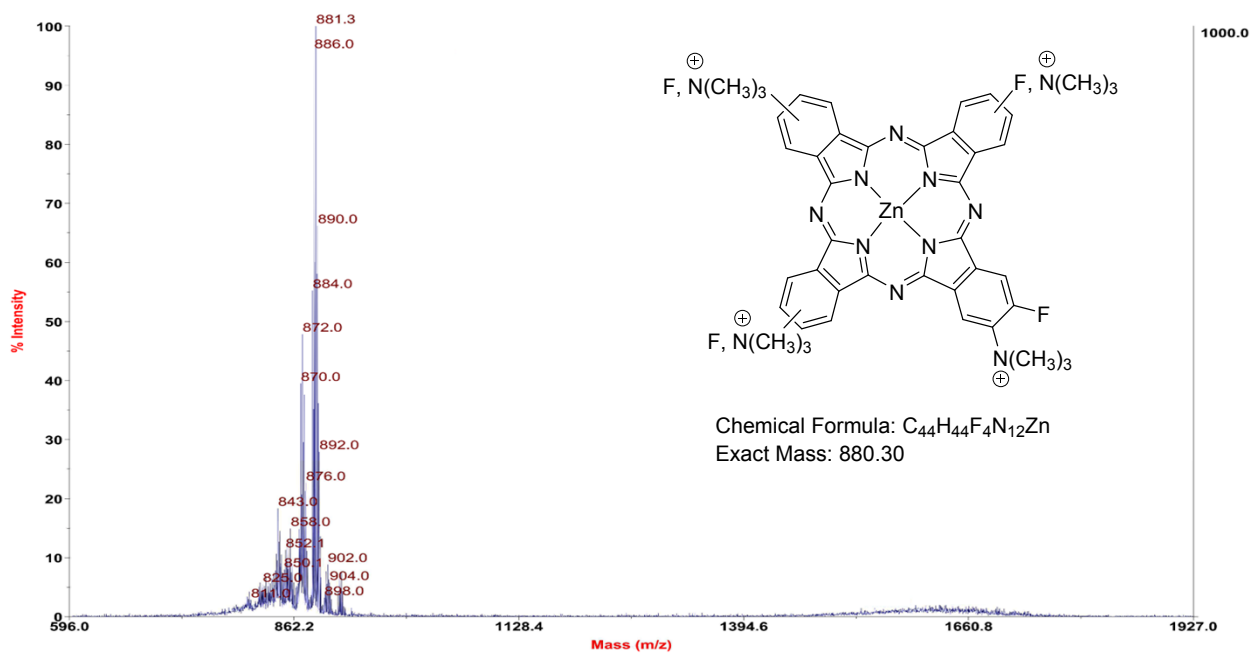

Fig. S6 MALDI-TOF MS spectrum of **1a**.

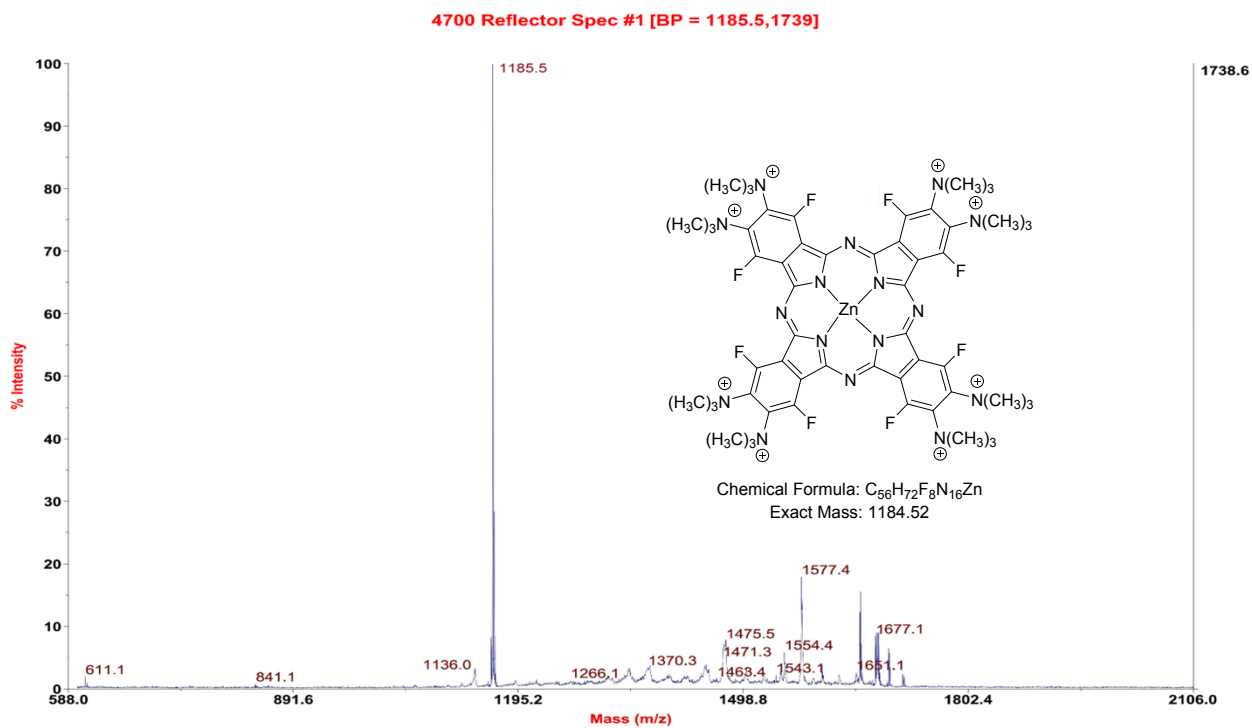

**Fig. S7** MALDI-TOF MS spectrum of **2a**.

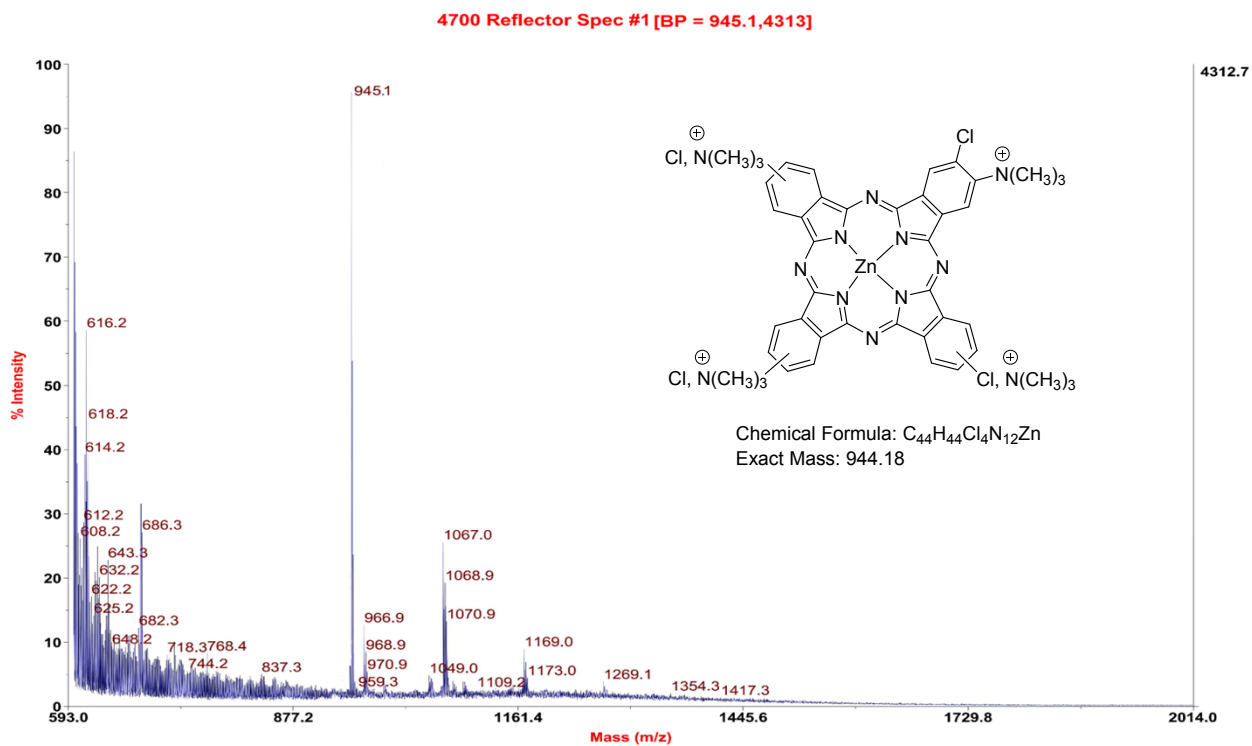

**Fig. S8** MALDI-TOF MS spectrum of **3a**.

### 3. Solubility studies in DMSO and PBS

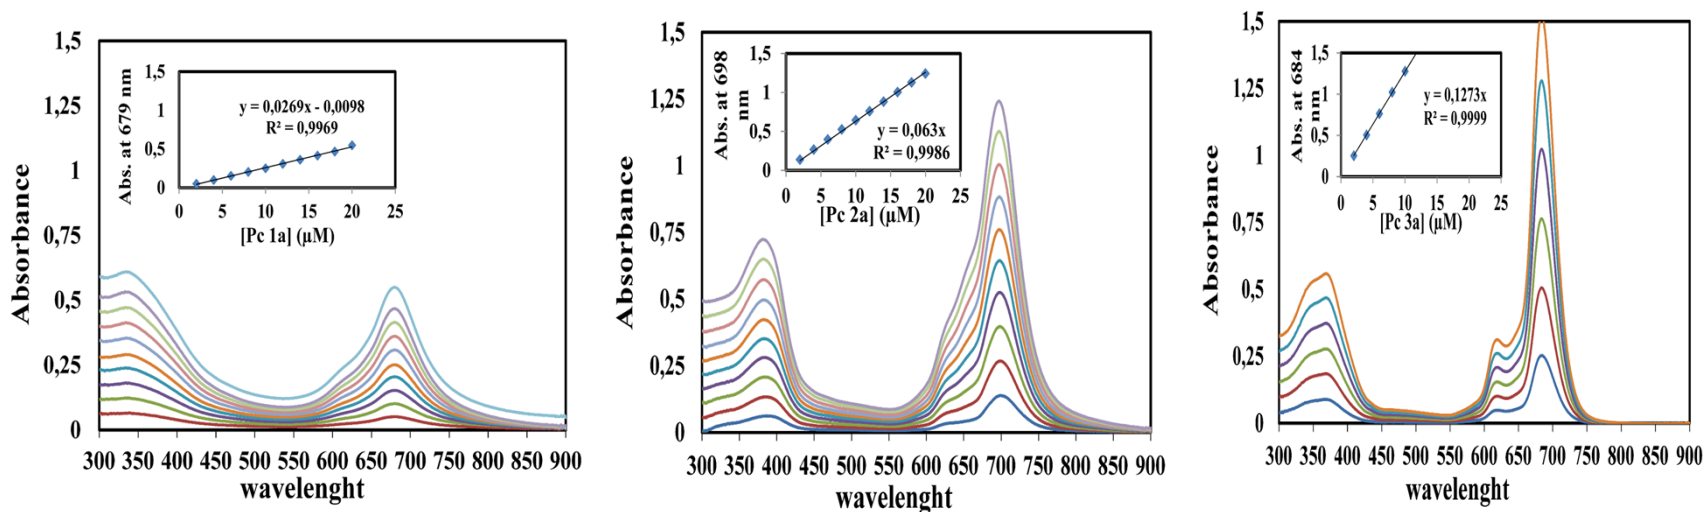

**Fig. S9** UV-visible spectra of the phthalocyanines **1a**, **2a** and **3a** in DMSO at different concentrations. The regression graphics represent absorbance of the Q-band of each Pc in DMSO *versus* concentrations.

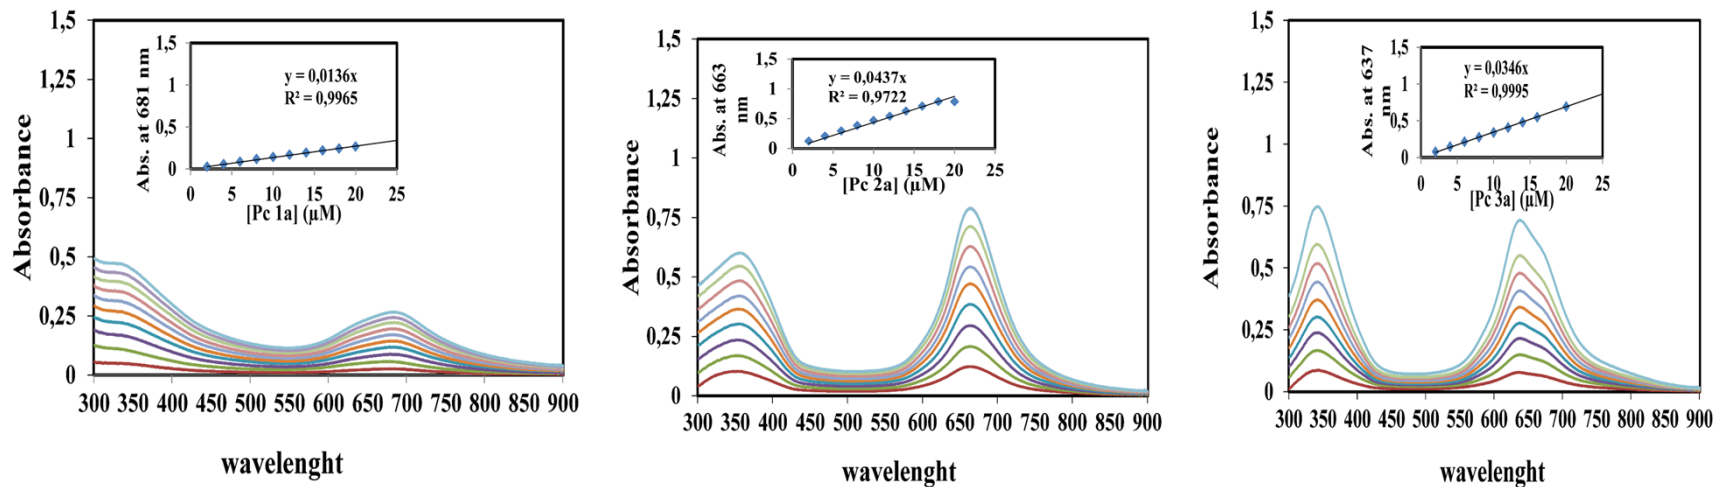

**Fig. S10** UV-visible spectra of the phthalocyanines **1a**, **2a** and **3a** in PBS at different concentrations. The regression graphics represent absorbance of the Q-band of each Pc in PBS *versus* concentrations.

#### 4. Absorption bands of the Pcs and emission bands of the light sources

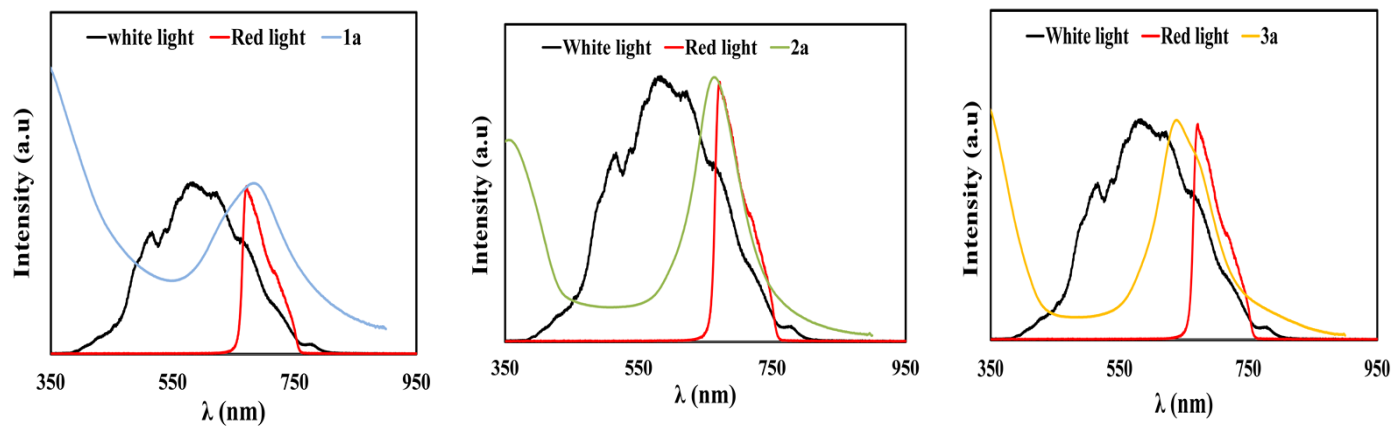

**Fig. S11** UV- Normalized UV-Vis spectra of Pcs **1a**, **2a** and **3a** in PBS and white and red light source emission.
